# Supplementary material for: Encoding calamitic mesomorphism in thermotropic lanthanidomesogens
Source: Royal Society of Chemistry journal article supplement (doi:10.1039/b605253c), 2006-01-01
Supplement: b605253c.pdf [file b605253c.pdf]

# Supplementary Material (ESI) for Chemical Communications  
# This journal is © The Royal Society of Chemistry 2006

**Encoding calamitic mesomorphism in thermotropic lanthanidomesogens.**

---

**Emmanuel Terazzi, Bernard Bocquet, Stéphane Campidelli, Bertrand Donnio, Daniel  
Guillon, Robert Deschenaux,\* and Claude Piguet\***

**Electronic Supporting Information (ESI)**

(13 pages)

## Experimental Section

### Solvents, Starting Materials, and Syntheses.

Chemicals were purchased from Fluka AG and Aldrich, and used without further purification unless otherwise stated. The synthons **1**,<sup>1</sup> **4**,<sup>2</sup> and **5**<sup>3</sup> were prepared according to literature procedures. Silicagel (Acros, 0.035-0.07 mm) was used for preparative column chromatography. The nitrate salts  $\text{Ln}(\text{NO}_3)_3 \cdot x\text{H}_2\text{O}$  (Ln = Lu, Tb, Gd and Eu,  $x = 1-4$ ) were prepared from the corresponding oxides (Rhodia, 99.99%).<sup>4</sup> The Ln content of solid salts was determined by complexometric titrations with Titriplex III (Merck) in the presence of urotropine and xylene orange.<sup>5</sup> Acetonitrile and dichloromethane were distilled over calcium hydride.

### Preparation of synthon 2

To a solution of 4-carboxybenzaldehyde (0.32 g, 2.12 mmol), DCC (1.09 g, 5.30 mmol) and 4-DMAP (catalytic) in  $\text{CH}_2\text{Cl}_2$  (100 ml), **1** (1.00 g, 2.12 mmol) was added. After 15 minutes stirring at room temperature, the solution was refluxed for 16 hours. The solvent was evaporated, and the solid residue purified by column chromatography ( $\text{CH}_2\text{Cl}_2/\text{MeOH}$  100:0 and then 99.6: 0.4) to give **2** (0.42 g, yield: 33%).

<sup>1</sup>H NMR in  $\text{CDCl}_3$ : 1.30-1.56 (12H, m); 1.78-1.88 (4H, m); 4.07 (2H, t,  $J^3=6.4$  Hz); 4.38 (2H, t,  $J^3=6.8$  Hz); 7.00 (2H, d,  $J^3=9.2$  Hz); 7.34 (2H, d,  $J^3=8.4$  Hz); 7.66 (2H, d,  $J^3=8.4$  Hz); 7.71 (2H, d,  $J^3=8.4$  Hz); 7.76 (2H, d,  $J^3=8.4$  Hz); 7.97 (2H, d,  $J^3=8.0$  Hz); 8.17 (2H, d,  $J^3=8.8$  Hz); 8.22 (2H, d,  $J^3=8.0$  Hz); 10.13 (1H, s). <sup>13</sup>C NMR in  $\text{CDCl}_3$ : ( $\text{C}_{\text{prim}}$ ) 26.02; 28.67; 29.12; 29.26; 29.35; 29.46; 29.49; 65.77; 68.36 ( $\text{C}_{\text{sec}}$ ) 114.38; 122.59; 127.71; 128.37; 129.53; 130.17; 132.38; 132.68 ( $\text{C}_{\text{tert}}$ ) 111.00; 118.92; 121.24; 135.49; 136.72; 139.10; 144.88; 151.60; 163.71; 164.85; 165.65; 191.69 ( $\text{C}_{\text{quat}}$ ). ESI-MS ( $\text{CH}_2\text{Cl}_2/\text{MeOH}$  9:1):  $m/z = 626.5$  ( $[\text{M}+\text{Na}]^+$ ).

### Preparation of synthon 3

**2** (0.35 g, 0.58 mmol),  $\text{NaClO}_2$  (0.20 g, 2.19 mmol) and  $\text{H}_2\text{NSO}_3\text{H}$  (0.21 g, 2.19 mmol) were dissolved in a THF/ $\text{H}_2\text{O}$  (1:1) mixture (100 ml). The solution was stirred at room temperature for 2 hours. THF was evaporated under vacuum. The aqueous phase was extracted with hot  $\text{CH}_2\text{Cl}_2$  (100

ml) in order to avoid precipitation. The organic phase was dried with anhydrous Na<sub>2</sub>SO<sub>4</sub> and filtered. Evaporation to dryness gave **3** (0.35 g, yield: 97%).

<sup>1</sup>H NMR in *d*<sup>6</sup>-DMSO : 1.26-1.47 (12H, m) ; 1.69-1.77 (4H, m) ; 4.08 (2H, t, *J*<sup>3</sup>=6.4 Hz) ; 4.30 (2H, t, *J*<sup>3</sup>=6.4 Hz) ; 7.13 (2H, d, *J*<sup>3</sup>=8.8 Hz) ; 7.42 (2H, d, *J*<sup>3</sup>=8.8 Hz) ; 7.85 (2H, d, *J*<sup>3</sup>=8.4 Hz) ; 7.91-7.97 (4H, m) ; 8.07 (4H, s) ; 8.09 (2H, d, *J*<sup>3</sup>=8.8 Hz) 13.36 (1H, br). <sup>13</sup>C NMR in CDCl<sub>3</sub> : (C<sub>prim</sub>) 26.01 ; 28.66 ; 29.11 ; 29.24 ; 29.34 ; 29.44 ; 29.47 ; 65.71 ; 68.36 (C<sub>sec</sub>) 114.38 ; 122.60 ; 127.72 ; 128.37 ; 129.64 ; 130.18 ; 132.39 ; 132.68 (C<sub>tert</sub>) 111.00 ; 118.92 ; 121.22 ; 132.80 ; 135.11 ; 136.73 ; 144.90 ; 151.59 ; 163.71 ; 164.89 ; 165.76 ; 170.47 (C<sub>quat</sub>). ESI-MS (CH<sub>2</sub>Cl<sub>2</sub>/MeOH 9:1): *m/z* = 642.5 ([M+Na]<sup>+</sup>).

### Preparation of synthon 6

**5** (1.00 g, 0.67 mmol), NaClO<sub>2</sub> (0.23 g, 2.50 mmol) and H<sub>2</sub>NSO<sub>3</sub>H (0.24 g, 2.50 mmol) were dissolved in a THF / H<sub>2</sub>O (2:1) mixture (50 ml). The solution was stirred at room temperature for 2 hours. THF was evaporated under vacuum. The aqueous phase was extracted with CH<sub>2</sub>Cl<sub>2</sub> (100 ml). The organic phase was dried with anhydrous Na<sub>2</sub>SO<sub>4</sub> and filtered. Evaporation to dryness followed by precipitation (dissolution in CH<sub>2</sub>Cl<sub>2</sub> and precipitation by pouring the solution into MeOH) gave **6** (1.01 g, yield: 100%).

<sup>1</sup>H NMR in CDCl<sub>3</sub> : 1.37-1.49 (36H, m) ; 1.77-1.90 (12H, m) ; 4.06 (6H, t, *J*<sup>3</sup>=6.8 Hz) ; 4.38 (6H, t, *J*<sup>3</sup>=6.8 Hz) ; 6.97 (4H, d, *J*<sup>3</sup>=8.8 Hz) ; 6.98 (2H, d, *J*<sup>3</sup>=9.2 Hz) ; 7.33 (4H, d, *J*<sup>3</sup>=8.8 Hz) ; 7.64 (4H, d, *J*<sup>3</sup>=8.8 Hz) ; 7.71 (4H, d, *J*<sup>3</sup>=8.4 Hz) ; 7.74 (4H, d, *J*<sup>3</sup>=8.8 Hz) ; 8.09 (2H, d, *J*<sup>4</sup>=1.2 Hz) ; 8.14-8.20 (10H, m) ; 8.62 (1H, t, *J*<sup>4</sup>=1.2 Hz). <sup>13</sup>C NMR in CDCl<sub>3</sub> : (C<sub>prim</sub>) 25.98 ; 26.01 ; 28.67 ; 29.11 ; 29.26 ; 29.36 ; 29.45 ; 29.49 ; 65.70 ; 65.81 ; 68.37 ; 68.40 (C<sub>sec</sub>) 114.40 ; 114.47 ; 122.60 ; 127.37 ; 127.70 ; 127.95 ; 128.36 ; 129.62 ; 130.15 ; 132.38 ; 132.47 ; 132.67 (C<sub>tert</sub>) 100.01 ; 110.98 ; 118.91 ; 120.76 ; 121.19 ; 132.35 ; 132.99 ; 135.01 ; 136.68 ; 144.86 ; 151.11 ; 151.60 ; 163.73 ; 163.89 ; 164.59 ; 164.88 ; 165.15 ; 165.78 ; 170.42 (C<sub>quat</sub>). ESI-MS (CH<sub>2</sub>Cl<sub>2</sub>/MeOH 9:1): *m/z* = 1538.8 ([M+Na]<sup>+</sup>).

### Preparation of L3.

**4** (0.097 g, 0.24 mmol) was added to a solution of **3** (0.30 g, 0.48 mmol), EDCI (0.19 g, 0.97 mmol) and 4-DMAP (catalytic) in CH<sub>2</sub>Cl<sub>2</sub> (50 ml). After 15 minutes stirring at room temperature, the solution was refluxed for 12 hours under an inert atmosphere. The solvent was evaporated and the organic residue redissolved in CH<sub>2</sub>Cl<sub>2</sub> (100 ml). The organic phase was washed with water (3 x 100 ml), dried with anhydrous Na<sub>2</sub>SO<sub>4</sub>, filtered and evaporated under vacuum. The residue was purified by column chromatography (CH<sub>2</sub>Cl<sub>2</sub>/MeOH 100:0, 99.5:0.5, 99.3:0.7 and finally 99:1) to give L3 (0.30 g, yield: 77%).

<sup>1</sup>H NMR in CDCl<sub>3</sub> : 1.39-1.47 (16H, m) ; 1.43 (6H, t,  $J^3=7.2$  Hz) ; 1.47-1.52 (8H, m) ; 1.81-1.89 (8H, m) ; 4.08 (4H, t,  $J^3=6.8$  Hz) ; 4.41 (4H, t,  $J^3=6.8$  Hz) ; 4.83 (4H, q,  $J^3=7.2$  Hz) ; 7.02 (4H, d,  $J^3=8.8$  Hz) ; 7.26 (2H, dd,  $J^3=8.8$  Hz,  $J^4=2.0$  Hz) ; 7.35 (4H, d,  $J^3=8.8$  Hz) ; 7.54 (2H, d,  $J^3=8.8$  Hz) ; 7.66 (4H, d,  $J^3=8.8$  Hz) ; 7.70 (4H, d,  $J^3=8.4$  Hz) ; 7.74 (2H, d,  $J^4=2.0$  Hz) ; 7.75 (4H, d,  $J^3=8.4$  Hz) ; 8.11 (1H, t,  $J^3=8.0$  Hz) ; 8.17 (4H, d,  $J^3=9.2$  Hz) ; 8.22 (4H, d,  $J^3=8.4$  Hz) ; 8.37 (4H, d,  $J^3=8.4$  Hz) ; 8.38 (2H, d,  $J^3=8.0$  Hz). <sup>13</sup>C NMR in CDCl<sub>3</sub> : 15.53 (C<sub>prim</sub>) 26.02 ; 26.04 ; 28.69 ; 29.12 ; 29.28 ; 29.36 ; 29.47 ; 29.50 ; 40.13 ; 65.73 ; 68.37 (C<sub>sec</sub>) 110.67 ; 112.92 ; 114.39 ; 118.05 ; 122.60 ; 126.13 ; 127.71 ; 128.37 ; 129.71 ; 130.23 ; 132.38 ; 132.67 ; 138.38 (C<sub>tert</sub>) 111.00 ; 118.92 ; 121.22 ; 133.34 ; 134.89 ; 136.72 ; 144.89 ; 146.78 ; 151.59 ; 163.71 ; 164.87 ; 165.04 ; 165.83 (C<sub>quat</sub>). ESI-MS (CH<sub>2</sub>Cl<sub>2</sub>/MeOH 9:1):  $m/z = 1603.8$  ([M+H]<sup>+</sup>). Anal Calcd for C<sub>99</sub>H<sub>91</sub>N<sub>7</sub>O<sub>14</sub>·1.3 H<sub>2</sub>O : C, 73.14; H, 5.80; N, 6.03. Found : C, 73.15; H, 5.84; N 5.91.

#### Preparation of L4.

**4** (0.040 g, 0.10 mmol) was added to a solution of **6** (0.30 g, 0.20 mmol), EDCI (0.076 g, 0.40 mmol) and 4-DMAP (catalytic) in CH<sub>2</sub>Cl<sub>2</sub> (50 ml). After 15 minutes stirring at room temperature, the solution was refluxed for 12 hours under an inert atmosphere. The solvent was evaporated and the organic residue redissolved in CH<sub>2</sub>Cl<sub>2</sub> (100 ml). The organic phase was washed with water (4 x 100 ml), dried with anhydrous Na<sub>2</sub>SO<sub>4</sub>, filtered and then evaporated under vacuum. The residue was purified by column chromatography (CH<sub>2</sub>Cl<sub>2</sub>:MeOH 100:0 and finally 99.5:1.5). The product was

dissolved in a minimum volume of  $\text{CH}_2\text{Cl}_2$  and poured into acetone. Pure L4 was filtered and dried under vacuum at 100 °C (0.024 g, yield: 70%).

$^1\text{H}$  NMR in  $\text{CDCl}_3$  : 1.31-1.57 (72H, m) ; 1.45 (6H, t,  $J^3=7.2$  Hz) ; 1.77-1.91 (24H, m) ; 4.04-4.09 (12H, m) ; 4.36-4.42 (12H, m) ; 4.85 (4H, q,  $J^3=7.2$  Hz) ; 7.00 (8H, d,  $J^3=8.8$  Hz) ; 7.01 (4H, d,  $J^3=8.4$  Hz) ; 7.28 (2H, dd,  $J^3=8.8$  Hz,  $J^4=2.0$  Hz) ; 7.33 (8H, d,  $J^3=8.4$  Hz) ; 7.54 (2H, d,  $J^3=8.8$  Hz) ; 7.64 (8H, d,  $J^3=8.4$  Hz) ; 7.71 (8H, d,  $J^3=8.4$  Hz) ; 7.74 (2H, d,  $J^4=2.0$  Hz) ; 7.75 (8H, d,  $J^3=8.4$  Hz) ; 8.08 (2H, d,  $J^4=1.2$  Hz) ; 8.11 (1H, t,  $J^3=8.0$  Hz) ; 8.18 (12H, d,  $J^3=8.8$  Hz) ; 8.23 (4H, d,  $J^3=8.4$  Hz) ; 8.37 (4H, d,  $J^3=8.4$  Hz) ; 8.40 (2H, d,  $J^3=8.0$  Hz).  $^{13}\text{C}$  NMR in  $\text{CDCl}_3$  : 0.98 ( $\text{C}_{\text{prim}}$ ) 15.45 ; 25.90 ; 25.92 ; 25.96 ; 25.97 ; 28.61 ; 28.63 ; 29.04 ; 29.18 ; 29.22 ; 29.28 ; 29.31 ; 29.37 ; 29.41 ; 29.44 ; 40.02 ; 65.64 ; 65.70 ; 68.31 ; 68.35 ( $\text{C}_{\text{sec}}$ ) 110.56 ; 112.92 ; 114.33 ; 114.41 ; 117.87 ; 122.52 ; 125.95 ; 127.28 ; 127.64 ; 127.87 ; 128.29 ; 129.65 ; 130.16 ; 132.31 ; 132.39 ; 132.61 ; 138.25 ( $\text{C}_{\text{tert}}$ ) 110.96 ; 118.83 ; 120.73 ; 121.17 ; 134.07 ; 136.64 ; 143.18 ; 144.82 ; 150.97 ; 151.06 ; 151.56 ; 163.66 ; 163.84 ; 164.51 ; 164.78 ; 164.97 ; 165.05 ; 165.76 ( $\text{C}_{\text{quat}}$ ). Anal Calcd for  $\text{C}_{209}\text{H}_{209}\text{N}_9\text{O}_{34}\cdot 1.39 \text{H}_2\text{O}$ : C, 73.49; H, 6.25; N, 3.69. Found : C, 73.49; H, 6.23; N 3.57.

### Preparation of the Complexes $[\text{Ln}(\text{Li})(\text{NO}_3)_3]$ (Ln = Lu, Tb, Gd and Eu, $i = 3, 4$ )

L1 (1.0 equivalent, typically 100 mg) in dichloromethane (5 mL) was added to one equivalent  $\text{Ln}(\text{NO}_3)_3\cdot x\text{H}_2\text{O}$  (Ln = Lu, Tb, Gd and Eu, 1.0 equivalent) in acetonitrile (5 mL). After 1 h. stirring at RT, the dichloromethane was evaporated and the white precipitate was filtered, washed with  $\text{CH}_3\text{CN}$  and dried to give 80-90 % of  $[\text{Ln}(\text{Li})(\text{NO}_3)_3]$  (Ln = Lu, Tb, Gd and Eu,  $i = 3, 4$ ) containing variable quantities of co-crystallized water molecules. All the complexes were characterized by IR spectra and elemental analyses (Table S1).

### Spectroscopic and Analytical Measurements.

$^1\text{H}$  and  $^{13}\text{C}$  NMR spectra were recorded at 25 °C on a Bruker Avance 400 MHz spectrometer. Chemical shifts are given in ppm with respect to TMS. Diffusion experiments were recorded at 400-MHz-proton-Larmor frequency at room temperature. The sequence corresponds to Bruker pulse program *ledbpgp2s*<sup>6</sup> using stimulated echo, bipolar gradients and longitudinal eddy current

delay as z filter. The four 2 ms gradients pulses have sine-bell shapes and amplitudes ranging linearly from 2.5 to 50 G/cm in 16 steps. The diffusion delay was 100 ms and the number of scan 16. The processing was done using a line broadening of 5 Hz and the diffusion rates calculated using the Bruker processing package. Pneumatically-assisted electrospray (ESI-MS) mass spectra were recorded from  $10^{-4}$  mol·dm<sup>-3</sup> solutions on a Finnigan SSQ7000 instrument. TG were performed with a thermogravimetric balance Seiko TG/DTA 320 (under N<sub>2</sub>). DSC traces were obtained with a Seiko DSC 220C differential scanning calorimeter from 3-5 mg samples (5 °C·min<sup>-1</sup>, under N<sub>2</sub>). The characterizations of the mesophases were performed with a polarizing microscope Leitz Orthoplan-Pol with a Leitz LL 20x/0.40 polarizing objective, and equipped with a Linkam THMS 600 variable-temperature stage. The SA-XRD patterns were obtained with three different experimental set-ups. In all cases, a linear monochromatic Cu-K $\alpha$  beam ( $\lambda = 1.5405$  Å) was obtained using a sealed-tube generator (900 W) equipped with a bent quartz monochromator. In the first set, the transmission Guinier geometry was used, whereas a Debye-Scherrer-like and a flat film geometry were used in the second and third experimental set-ups, respectively. In all cases, the crude powder was filled in Lindemann capillaries of 1 mm diameter and 10 mm wall-thickness. An initial set of diffraction patterns was recorded on an image plate; periodicities up to 80 Å can be measured, and the sample temperature controlled to within  $\pm 0.3$  °C from 20 to 350 °C. The second set of diffraction patterns was recorded with a curved Inel CPS 120 counter gas-filled detector linked to a data acquisition computer; periodicities up to 60 Å can be measured, and the sample temperature controlled to within  $\pm 0.05$  °C from 20 to 200°C. Finally, the last set of diffraction patterns was recorded on image plate, and periodicities up to 350 Å can be measured, and the sample temperature controlled to within  $\pm 0.01$  °C from 20 to 200°C. In each case, exposure times were varied from 1 to 24 h. Elemental analyses were performed by Dr. H. Eder from the microchemical Laboratory of the University of Geneva.

## References

- 1 B. Dardel, D. Guillon, B. Heinrich and R. Deschenaux, *J. Mater. Chem.*, 2001, **11**, 2814.
- 2 H. Nozary, C. Piguet, J.-P. Rivera, P. Tissot, G. Bernardinelli, N. Vulliermet, J. Weber and J.-C. Bünzli, *Inorg. Chem.*, 2000, **39**, 5286.
- 3 S. Campidelli, J. Lenoble, J. Barberá, F. Paolucci, M. Marcaccio, D. Paolucci and R. Deschenaux, *Macromolecules*, 2005, **38**, 7915.
- 4 J.-C. G. Bünzli, E. Moret et J.-R. Yersin, *Helv. Chim. Acta*, 1978, **61**, 762.
- 5 G. Schwarzenbach, *Complexometric titrations*, Chapman & Hall, London, 1957.
- 6 D. Wu, A. Chen and J. Johnson, *J. Magn. Reson. A.*, 1995, **155**, 260.

**Table S1** Elemental Analyses for the Complexes  $[\text{Ln}(\text{Li})(\text{NO}_3)_3]$ , ( $i = 3, 4$ , Ln = Lu, Tb, Gd and Eu).

| Compd                                                                 | %C found | %H found | %N found | %C calc | %H calc | %N calc |
|-----------------------------------------------------------------------|----------|----------|----------|---------|---------|---------|
| $[\text{Lu}(\text{L3})(\text{NO}_3)_3] \cdot 2.1 \text{ H}_2\text{O}$ | 59.40    | 4.85     | 6.97     | 59.39   | 4.85    | 6.97    |
| $[\text{Eu}(\text{L3})(\text{NO}_3)_3]$                               | 61.15    | 4.98     | 7.08     | 61.27   | 4.73    | 7.22    |
| $[\text{Lu}(\text{L4})(\text{NO}_3)_3] \cdot 3.6 \text{ H}_2\text{O}$ | 65.78    | 5.61     | 4.29     | 65.78   | 5.71    | 4.40    |
| $[\text{Tb}(\text{L4})(\text{NO}_3)_3] \cdot 3.6 \text{ H}_2\text{O}$ | 66.08    | 5.71     | 4.18     | 66.07   | 5.73    | 4.42    |
| $[\text{Gd}(\text{L4})(\text{NO}_3)_3] \cdot 3.6 \text{ H}_2\text{O}$ | 66.09    | 5.76     | 4.41     | 66.09   | 5.73    | 4.42    |
| $[\text{Eu}(\text{L4})(\text{NO}_3)_3] \cdot 2.7 \text{ H}_2\text{O}$ | 66.15    | 5.71     | 4.28     | 66.15   | 5.71    | 4.28    |

**Table S2**  $^1\text{H}$  NMR shifts for the aromatic protons in the ligands L1, L3 and L4, and in their complexes  $[\text{Ln}(\text{Li})(\text{NO}_3)_3]$  ( $\text{CD}_2\text{Cl}_2$ , 293 K).

| Compd                                   | H1   | H2   | H6   | H7   | H9   |
|-----------------------------------------|------|------|------|------|------|
| L1                                      | 8.05 | 8.32 | 7.48 | 7.18 | 7.64 |
| $[\text{Lu}(\text{L1})(\text{NO}_3)_3]$ | 8.51 | 8.23 | 7.56 | 7.41 | 8.12 |
| L3                                      | 8.11 | 8.38 | 7.54 | 7.26 | 7.74 |
| $[\text{Lu}(\text{L3})(\text{NO}_3)_3]$ | 8.53 | 8.24 | 7.68 | 7.46 | 7.77 |
| L4                                      | 8.11 | 8.40 | 7.54 | 7.28 | 7.74 |
| $[\text{Lu}(\text{L4})(\text{NO}_3)_3]$ | 8.53 | 8.23 | 7.68 | 7.45 | 7.76 |



**Table S3** Indexation at a given temperature ( $T/^\circ\text{C}$ ) for the Reflections Detected in the Liquid-Crystalline Phases by SA-XRD for the Complexes  $[\text{Ln}(\text{L4})(\text{NO}_3)_3]$  ( $\text{Ln} = \text{Lu}, \text{Tb}, \text{Eu}$  and  $\text{Gd}$ ).

|                                          | $T/^\circ\text{C}$ | $d_{00l}(\text{mes})/\text{\AA}$ | $I/\text{au}$ | $00l$ | $A/\text{\AA}^2{}^a$ |
|------------------------------------------|--------------------|----------------------------------|---------------|-------|----------------------|
| [Lu(L4)(NO <sub>3</sub> ) <sub>3</sub> ] | 100                | 128.0                            | S             | 001   | 46.5                 |
|                                          | Heating            | 64.0                             | S             | 002   |                      |
|                                          |                    | 8.9                              | Br            |       |                      |
|                                          |                    | 4.5                              | Br            |       |                      |
|                                          | 120                | 126.2                            | S             | 001   | 47.8                 |
|                                          | Heating            | 63.1                             | S             | 002   |                      |
|                                          |                    | 8.9                              | Br            |       |                      |
|                                          |                    | 4.5                              | Br            |       |                      |
|                                          | 140-160            | Cryst.                           |               |       |                      |
|                                          | Heating            |                                  |               |       |                      |
|                                          |                    |                                  |               |       |                      |
|                                          | 190                | 110.4                            | S             | 001   | 57.3                 |
| Heating                                  | 55.2               | S                                | 002           |       |                      |
|                                          | 4.5                | Br                               |               |       |                      |
|                                          | $T/^\circ\text{C}$ | $d_{00l}(\text{mes})/\text{\AA}$ | $I/\text{au}$ | $00l$ | $A/\text{\AA}^2{}^a$ |
| [Tb(L4)(NO <sub>3</sub> ) <sub>3</sub> ] | 100                | 128.0                            | S             | 001   | 46.5                 |
|                                          | Heating            | 64.0                             | S             | 002   |                      |
|                                          |                    | 4.5                              | Br            |       |                      |
|                                          | 120                | 125.4                            | S             | 001   | 48.1                 |
|                                          | Heating            | 62.7                             | S             | 002   |                      |
|                                          |                    | 4.5                              | Br            |       |                      |
|                                          | 140                | 121.0                            | S             | 001   | 50.5                 |
|                                          | Heating            | 60.5                             | S             | 002   |                      |
|                                          |                    | 4.5                              | Br            |       |                      |
|                                          | 160                | 111.8                            | S             | 001   | 55.5                 |
|                                          | Heating            | 55.9                             | S             | 002   |                      |
|                                          |                    | 4.5                              | Br            |       |                      |
| 180                                      | 107.0              | S                                | 001           | 58.7  |                      |
| Heating                                  | 53.5               | S                                | 002           |       |                      |
|                                          | 4.5                | Br                               |               |       |                      |

|                                          | $T/^\circ\text{C}$ | $d_{00l(\text{mes})}/\text{Å}$ | $I/\text{au}$ | $00l$ | $A/\text{Å}^2{}^a$ |
|------------------------------------------|--------------------|--------------------------------|---------------|-------|--------------------|
| [Gd(L4)(NO <sub>3</sub> ) <sub>3</sub> ] | 100                | 130.0                          | S             | 001   | 45.8               |
|                                          | Heating            | 65.0                           | S             | 002   |                    |
|                                          |                    | 4.5                            | Br            |       |                    |
|                                          | 120                | 126.2                          | S             | 001   | 47.8               |
|                                          | Heating            | 63.1                           | S             | 002   |                    |
|                                          |                    | 4.5                            | Br            |       |                    |
|                                          | 140                | 119.4                          | S             | 001   | 51.2               |
|                                          | Heating            | 59.7                           | S             | 002   |                    |
|                                          |                    | 4.5                            | Br            |       |                    |
|                                          | 160                | 112.6                          | S             | 001   | 55.1               |
|                                          | Heating            | 56.3                           | S             | 002   |                    |
|                                          |                    | 4.5                            | Br            |       |                    |
|                                          | $T/^\circ\text{C}$ | $d_{00l(\text{mes})}/\text{Å}$ | $I/\text{au}$ | $00l$ | $A/\text{Å}^2{}^a$ |
| [Eu(L4)(NO <sub>3</sub> ) <sub>3</sub> ] | 100                | 123.6                          | S             | 001   | 48.1               |
|                                          | Heating            | 61.8                           | S             | 002   |                    |
|                                          |                    | 4.5                            | Br            |       |                    |
|                                          | 120                | 125.4                          | S             | 001   | 48.1               |
|                                          | Heating            | 62.7                           | S             | 002   |                    |
|                                          |                    | 4.5                            | Br            |       |                    |
|                                          | 140                | 121.0                          | S             | 001   | 50.5               |
|                                          | Heating            | 60.5                           | S             | 002   |                    |
|                                          |                    | 4.5                            | Br            |       |                    |
|                                          | 160                | 117.0                          | S             | 001   | 53.0               |
|                                          | Heating            | 58.5                           | S             | 002   |                    |
|                                          |                    | 4.5                            | Br            |       |                    |
| 180                                      | 105.2              | S                              | 001           | 59.7  |                    |
| Heating                                  | 52.6               | S                              | 002           |       |                    |
|                                          | 4.5                | Br                             |               |       |                    |

<sup>a</sup> Molecular area  $A = V/d_{001}$  with  $V = MM_{\text{complex}} \cdot \lambda \cdot 10^{-24} / d \cdot N_{\text{av}}$ , ( $MM_{\text{complex}}$ , molecular weight of the complex,  $N_{\text{av}}$ , Avogadro's number, and  $\lambda = V_{\text{CH}_2}(T) / V_{\text{CH}_2}(T^0)$ , where  $V_{\text{CH}_2}(T) = 0.02023T + 26.5616$  ( $T$  in  $^\circ\text{C}$ ), and  $T^0 = 25^\circ\text{C}$ ,  $T$  temperature of the experiment).<sup>13</sup>

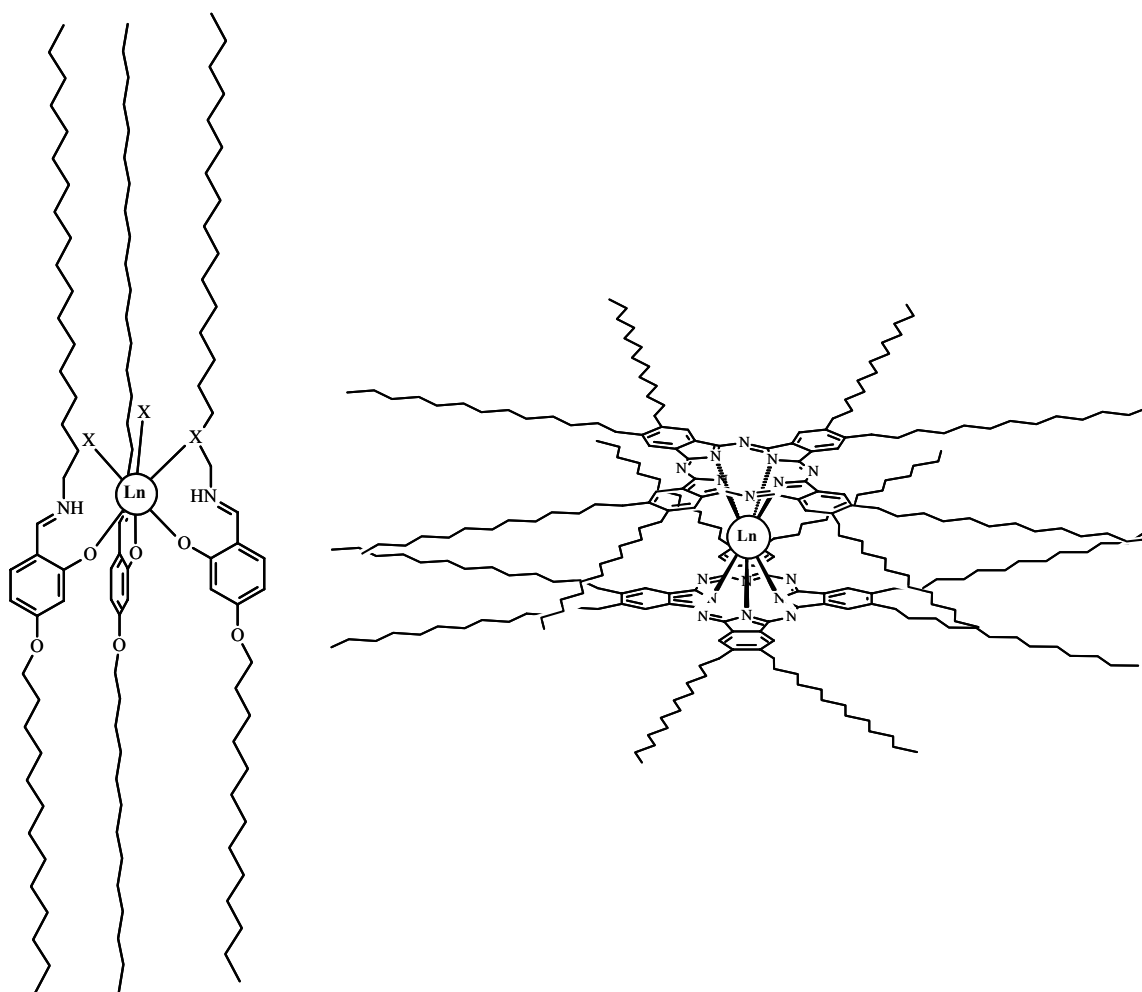

**Figure S1** Two examples of lanthanidomesogens obtained for complexes, in which the trivalent lanthanide is embedded within aromatic polarizable cavities.

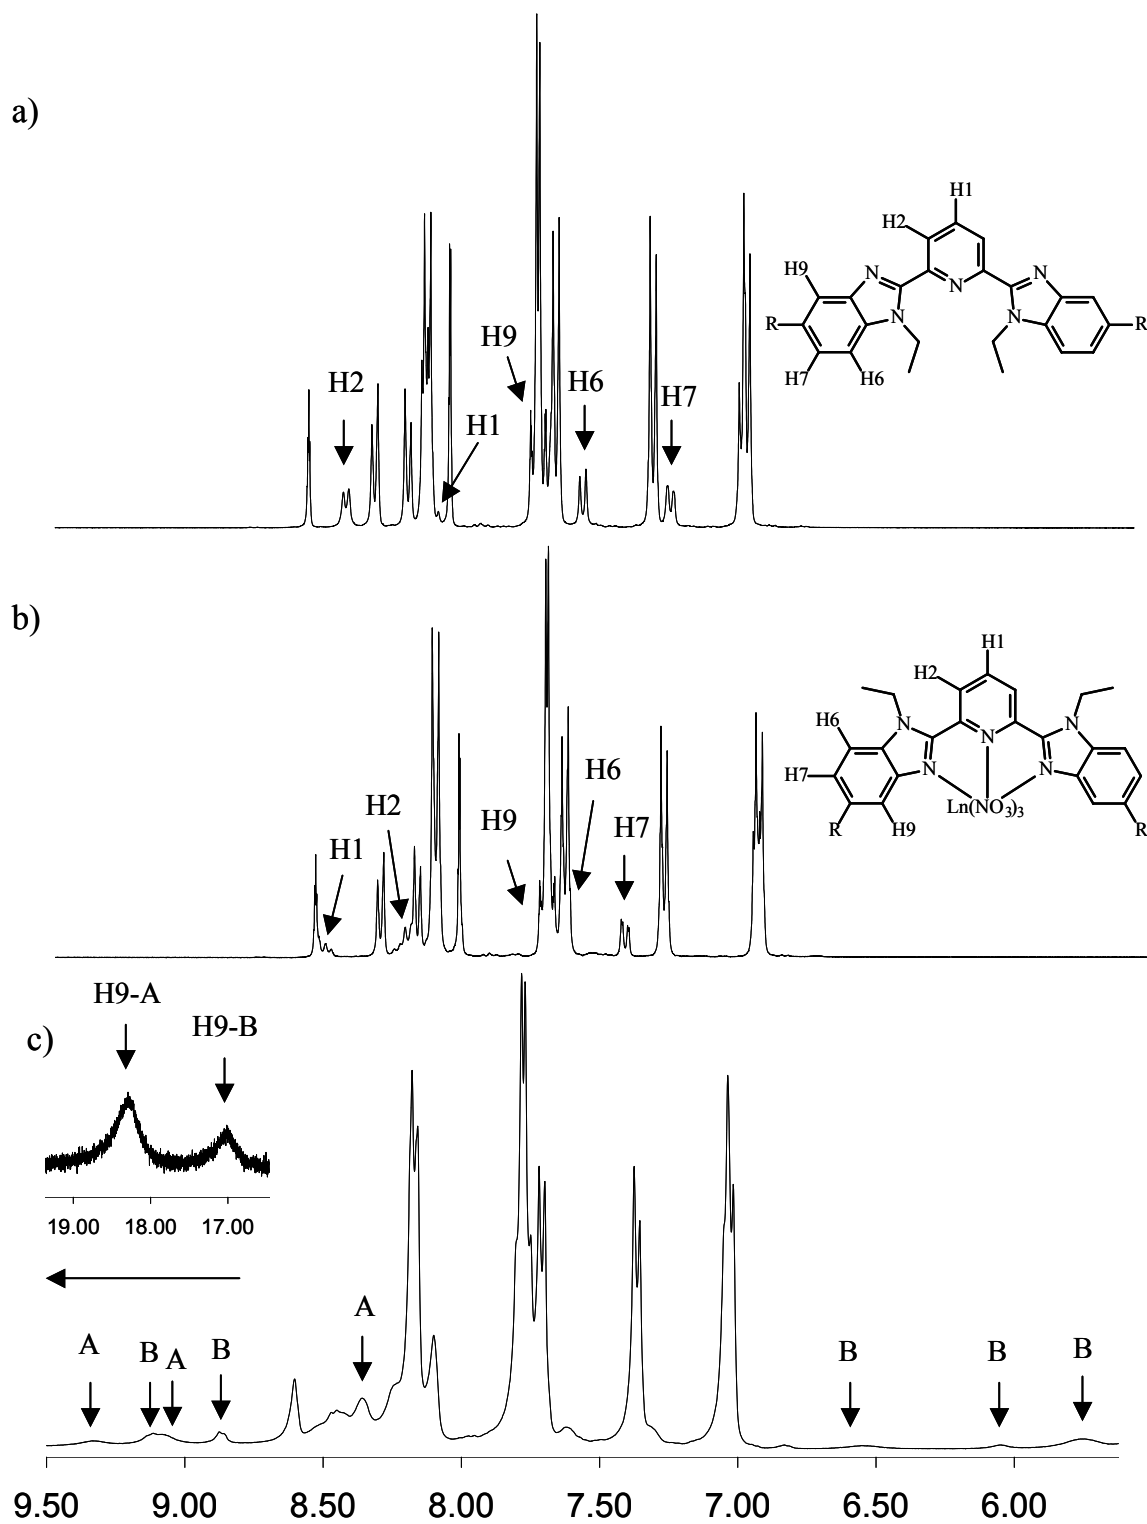

**Figure S2 :**  $^1\text{H}$  NMR spectra of a) L4, b)  $[\text{Lu}(\text{L4})(\text{NO}_3)_3]$  and c)  $[\text{Eu}(\text{L4})(\text{NO}_3)_3]$ .

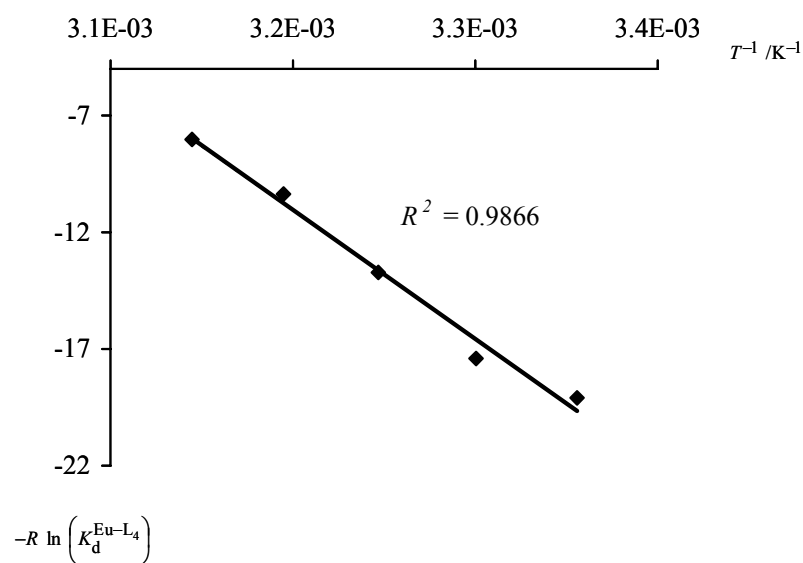

**Figure S3** Van't Hoff plot  $-R \ln(K_d^{\text{Eu,L4}})$  versus  $T^{-1}$ , from which the thermodynamic parameters  $\Delta H_d^{\text{Eu,L4}} = -55(4) \text{ kJ} \cdot \text{mol}^{-1}$  and  $\Delta S_d^{\text{Eu,L4}} = -166(11) \text{ J} \cdot \text{mol}^{-1} \cdot \text{K}^{-1}$  can be determined

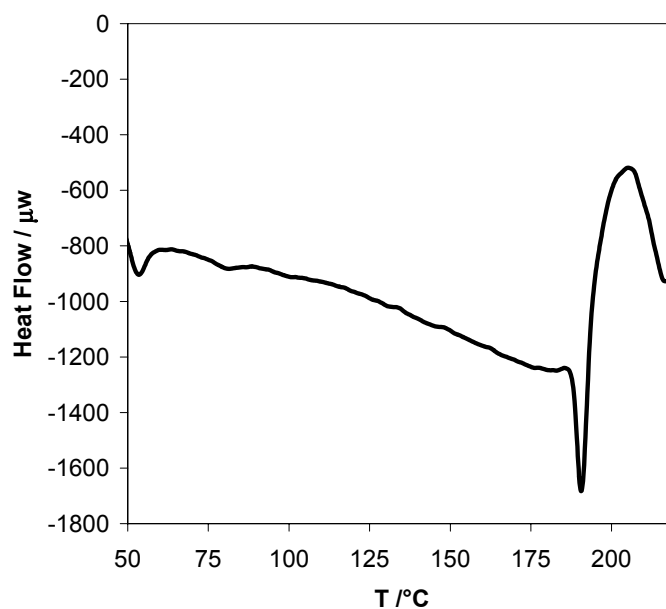

**Figure S4** DSC trace recorded for the complex  $[\text{Eu}(\text{L4})(\text{NO}_3)_3]$  during a single heating process.

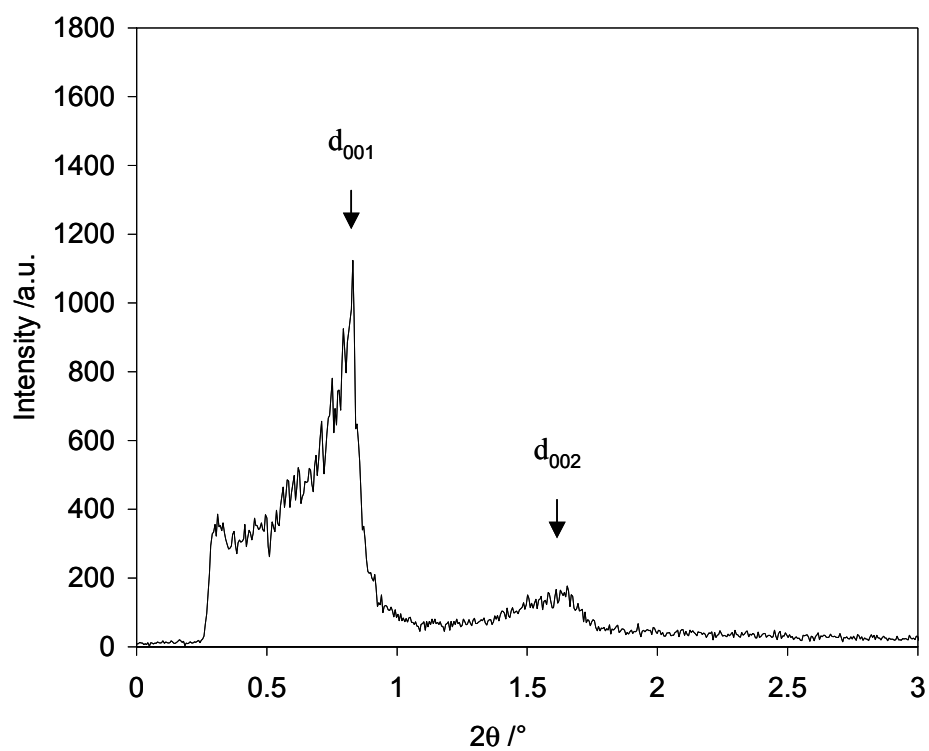

**Figure S5** SA-XRD profile in liquid crystalline phase, and associated indexation for [Eu(L4)(NO<sub>3</sub>)<sub>3</sub>] at 160°C.
